# Supplementary material for: Exploring the Climate and Topography of Olive Orchards in Extremadura, Southwestern Spain
Source: MDPI journal article supplement (doi:10.3390/land13040495), 2024-04-11
Supplement: s1 [file s1]

# Exploring the climate and topography of olive orchards in Extremadura, Southwestern Spain

## Supplementary material

**Table S1.** Olive grove area (ha) classified by altitude (m) in the olive-growing regions of Badajoz.

| Altitude(m)          | Olive-growing area (ha) by olive-growing region |               |               |               |                  |                    | Badajoz        |
|----------------------|-------------------------------------------------|---------------|---------------|---------------|------------------|--------------------|----------------|
|                      | Alburquerque                                    | Jerez-Llerena | La Serena     | La Siberia    | Tierra de Barros | Vegas del Guadiana |                |
| 0-100                | 0                                               | 96            | 0             | 0             | 21               | 4                  | 121            |
| 100-200              | 7                                               | 165           | 24            | 0             | 839              | 5,901              | 6,936          |
| 200-300              | 1,619                                           | 1,400         | 42            | 17            | 11,877           | 35,678             | 50,633         |
| 300-400              | 3,744                                           | 5,553         | 998           | 2,150         | 16,918           | 14,434             | 43,797         |
| 400-500              | 749                                             | 5,530         | 6,954         | 4,120         | 11,345           | 584                | 29,282         |
| 500-600              | 67                                              | 12,818        | 7,908         | 3,762         | 9,736            | 132                | 34,423         |
| 600-700              | 0                                               | 5,455         | 1,836         | 1,050         | 388              | 50                 | 8,779          |
| 700-800              | 0                                               | 1,532         | 687           | 304           | 29               | 0                  | 2,552          |
| 800-900              | 0                                               | 133           | 39            | 60            | 0                | 0                  | 232            |
| 900-1000             | 0                                               | 21            | 0             | 0             | 0                | 0                  | 21             |
| 1000-1100            | 0                                               | 6             | 0             | 0             | 0                | 0                  | 6              |
| <b>Total Badajoz</b> | <b>6,187</b>                                    | <b>32,708</b> | <b>18,487</b> | <b>11,463</b> | <b>51,155</b>    | <b>56,783</b>      | <b>176,783</b> |

**Table S2.** Olive grove area (ha) classified by altitude (m) in the olive-growing regions of Cáceres.

| Altitude(m)          | Olive-growing area (ha) by olive-growing region |              |                      |                    |              |                  | Cáceres       |
|----------------------|-------------------------------------------------|--------------|----------------------|--------------------|--------------|------------------|---------------|
|                      | Gata-Hurdes                                     | Ibores       | La Vera-Jerte-Ambroz | Logrosan-Guadalupe | Montánchez   | Resto de Cáceres |               |
| 0-100                | 0                                               | 0            | 0                    | 0                  | 0            | 5                | 5             |
| 100-200              | 2                                               | 2            | 0                    | 0                  | 0            | 6                | 11            |
| 200-300              | 83                                              | 170          | 48                   | 430                | 299          | 1,199            | 2,229         |
| 300-400              | 2,092                                           | 342          | 177                  | 2,634              | 834          | 3,497            | 9,577         |
| 400-500              | 8,182                                           | 690          | 602                  | 542                | 2,870        | 1,587            | 14,473        |
| 500-600              | 3,291                                           | 1,612        | 338                  | 1,147              | 623          | 319              | 7,329         |
| 600-700              | 1,390                                           | 1,544        | 260                  | 706                | 161          | 146              | 4,207         |
| 700-800              | 732                                             | 437          | 175                  | 483                | 75           | 14               | 1,915         |
| 800-900              | 289                                             | 75           | 112                  | 269                | 14           | 0                | 759           |
| 900-1000             | 71                                              | 13           | 69                   | 156                | 2            | 0                | 311           |
| 1000-1100            | 10                                              | 3            | 41                   | 31                 | 0            | 0                | 85            |
| 1100-1200            | 2                                               | 1            | 11                   | 9                  | 0            | 0                | 24            |
| 1200-1300            | 1                                               | 0            | 3                    | 1                  | 0            | 0                | 4             |
| <b>Total Cáceres</b> | <b>16,145</b>                                   | <b>4,889</b> | <b>1,836</b>         | <b>6,408</b>       | <b>4,876</b> | <b>6,774</b>     | <b>40,928</b> |
